# Supplementary material
Source: PubMed Central journal article supplement (PMC3131654)
Supplement: supp_77_12_3938__1.pdf [file supp_77_12_3938__1.pdf]

# The sulfate-reducing bacterium *Desulfovibrio desulfuricans* ND132 as a model for understanding bacterial mercury methylation

Cynthia C. Gilmour, Dwayne A. Elias, Amy M. Kucken, Steven D. Brown, Anthony V. Palumbo, Christopher W. Schadt and Judy D. Wall

## SUPPLEMENTAL MATERIAL

Table S1. Trace metal solution for SRM medium, 100X Stock

| Trace metal                                         | $\mu\text{M}$ |
|-----------------------------------------------------|---------------|
| ZnCl <sub>2</sub>                                   | 500           |
| MnCl <sub>2</sub> ·4H <sub>2</sub> O                | 500           |
| H <sub>2</sub> BO <sub>4</sub>                      | 800           |
| CoCl <sub>2</sub> ·6H <sub>2</sub> O                | 1000          |
| CuCl <sub>2</sub> ·2H <sub>2</sub> O                | 100           |
| NiCl <sub>2</sub> ·6H <sub>2</sub> O                | 100           |
| Na <sub>2</sub> MoO <sub>4</sub> ·2H <sub>2</sub> O | 150           |

Table S2. Vitamin Stock solution for SRM medium, 100X Stock

| Vitamin                     | mg/L |
|-----------------------------|------|
| Biotin                      | 2    |
| Nicotinic acid              | 20   |
| <i>p</i> -aminobenzoic acid | 10   |
| Thiamine                    | 20   |
| Pantothenic acid            | 10   |
| Pyridoxine·2HCl             | 50   |
| Cobalamine                  | 10   |

Table S3. List of *Desulfovibrio* strains used in alignment, including the accession numbers for the 16S rRNA sequences used.

| Strain                                                         | Sequence source | Accession # | DSM   | ATCC    |
|----------------------------------------------------------------|-----------------|-------------|-------|---------|
| <i>D. acrylicus</i>                                            | RDP             | U32578      | 10141 |         |
| <i>D. aerotolerans</i>                                         | RDP             | AY746987    | 16695 |         |
| <i>D. aespoeensis</i>                                          | RDP             | X95230      | 10631 |         |
| <i>D. africanus strain ADRI3</i>                               | RDP             | AM419445.1  |       |         |
| <i>D. africanus strain Benghazi</i>                            | RDP             | X99236      | 2603  |         |
| <i>D. alaskensis</i>                                           | RDP             | Y11984      | 16109 |         |
| <i>D. alcholorans</i>                                          | RDP             | AF053751    | 5433  |         |
| <i>D. alkalitolerans</i>                                       | RDP             | AY649785    | 16529 |         |
| <i>D. aminophilus</i>                                          | RDP             | AF067964    | 12254 |         |
| <i>D. bastinii</i>                                             | RDP             | AY359868    | 16055 | BAA-903 |
| <i>D. bizertensis</i>                                          | RDP             | DQ422859    | 18034 |         |
| <i>D. burkinensis</i>                                          | RDP             | AF053752    | 6830  |         |
| <i>D. caledoniensis</i>                                        | RDP             | U53465      |       |         |
| <i>D. carbinolicus</i>                                         | RDP             | AY626035    | 3852  |         |
| <i>D. carbinoliphilus</i>                                      | RDP             | DQ186200    | 17524 |         |
| <i>D. cuneatus</i>                                             | RDP             | X99501      | 11391 |         |
| <i>D. dechloroacetivorans</i>                                  | RDP             | AF230530    |       |         |
| <i>D. desulfuricans ND132</i>                                  | GenBank/SERC    | HQ693571.1  |       |         |
| <i>D. desulfuricans subs. aestuarii strain Styl 3</i>          | RDP/SERC        | FJ655909    | 17919 | 29578   |
| <i>D. desulfuricans subsp. desulfuricans strain El Agheila</i> | RDP/SERC        | M37316.1    | 1926  | none    |
| <i>D. desulfuricans subsp. desulfuricans strain Essex 6</i>    | RDP             | AF192153.1  | 642   | 29577   |
| <i>D. desulfuricans subsp. desulfuricans strain MB</i>         | RDP             | AF192154.1  | 6949  | 27774   |
| <i>D. desulfuricans strain G20</i>                             | RDP             | NC_007519.1 |       |         |
| <i>D. desulfuricans strain LS</i>                              | R. Devereux     |             |       |         |
| <i>D. ferrireducens strain 61T</i>                             | RDP             | DQ148944    | 16995 |         |
| <i>D. frigidus strain 18T</i>                                  | RDP             | DQ148943    | 17176 |         |
| <i>D. fructosivorans</i>                                       | RDP             | AF050101    | 3604  |         |
| <i>D. gabonensis</i>                                           | RDP             | U31080      | 10636 |         |
| <i>D. gigas</i>                                                | RDP             | DQ447183    | 1382  | 19364   |
| <i>D. gracilis</i>                                             | RDP             | U53464      | 16080 | BA-904  |
| <i>D. halophilus</i>                                           | RDP             | U48243      | 5663  |         |
| <i>D. hydrothermalis</i>                                       | RDP             | AF458778    | 14728 |         |
| <i>D. indonesiensis</i>                                        | RDP             | Y09504      | 15121 |         |
| <i>D. inopinatus</i>                                           | RDP             | AF177276    | 10711 |         |
| <i>D. intestinalis</i>                                         | RDP             | Y12254      | 11275 |         |
| <i>D. littoralis</i>                                           | RDP             | X99504      | 11393 |         |
| <i>D. longreachensis</i>                                       | RDP             | Z24450      |       |         |
| <i>D. longus</i>                                               | RDP             | AY359867    | 6739  | 51456   |
| <i>D. magneticus</i>                                           | RDP             | D43944      |       |         |
| <i>D. marinisediminis</i>                                      | RDP             | AB353727    | 17456 |         |
| <i>D. marinus</i>                                              | RDP             | DQ365924    | 18311 |         |
| <i>D. marrakechensis</i>                                       | RDP             | AM947130    | 19337 |         |
| <i>D. mexicanus</i>                                            | RDP             | AF227984    | 13116 |         |
| <i>D. oxamicus</i>                                             | RDP             | DQ122124    | 1925  | 33405   |
| <i>D. oxycliniae</i>                                           | RDP             | U33316      | 11498 |         |
| <i>D. pasquesii</i>                                            | RDP             | AY726757    | 16681 |         |
| <i>D. piger</i>                                                | RDP             | AF192152    |       | 29098   |
| <i>D. psychrotolerans</i>                                      | RDP             | AM418397    | 19430 |         |
| <i>D. putealis</i>                                             | RDP             | AY574979    | 16065 |         |
| <i>D. salexigens</i>                                           | RDP             | M34401.1    | 2638  | 14822   |
| <i>D. senezii</i>                                              | RDP             | AF050100    | 8436  |         |
| <i>D. sp BerOcl</i>                                            | RDP             | EU137840    |       |         |
| <i>D. sp. T2</i>                                               | SERC/GenBank    | HQ693572    |       |         |
| <i>D. sp. X2</i>                                               | SERC/GenBank    | HQ693573    |       |         |
| <i>D. sulfodismutans</i>                                       | RDP             | Y17764      | 3696  | 43913   |
| <i>D. termidus</i>                                             | RDP             | X87409      | 5308  | 49858   |
| <i>D. tunisiensis</i>                                          | RDP             | EF577029    | 19275 |         |
| <i>D. vietnamensis</i>                                         | RDP             | X93994      | 10520 |         |
| <i>D. vulgaris strain Hildenborough</i>                        | RDP             | AF418179    | 644   | 29579   |
| <i>D. zosteriae</i>                                            | RDP             | Y18049      | 11974 |         |
| <i>Desulfocurvus vexinensis</i>                                | RDP             | DQ841177    | 17965 |         |

Table S4. Compilation of literature reports of Hg methylation assays for *Desulfovibrio* species.

| Strain                                                    | Culture ID |       |            | MeHg <sup>a</sup><br>production | Reference          |
|-----------------------------------------------------------|------------|-------|------------|---------------------------------|--------------------|
|                                                           | DSMZ       | ATCC  | Other      |                                 |                    |
| <i>D. desulfuricans</i> LS                                |            |       |            | +                               | (1)                |
| <i>D. desulfuricans</i> ND132                             |            |       |            | +                               | This study         |
| <i>Desulfovibrio</i> T2                                   |            |       |            | +                               | This study         |
| <i>Desulfovibrio</i> X2                                   |            |       |            | +                               | This study         |
| <i>D. africanus</i> Benghazi                              | 2603       |       |            | +                               | (2, 6), this study |
| <i>D. africanus</i>                                       |            |       | ADR 13     | +                               | (6)                |
| <i>D. desulfuricans aestuarii</i> Sylt3                   |            | 29578 | NCIB 9335  | -                               | This study         |
| <i>D. desulfuricans subsp. desulfuricans</i>              | 1924       | 13541 | NCIB 9467  | +                               | (3, 4)             |
| <i>D. desulfuricans subsp. desulfuricans</i> MB           | 6949       | 27774 | NCIB 12833 | -                               | (6), this study    |
| <i>D. desulfuricans subsp. desulfuricans</i> Essex 6      | 642        | 29577 | NCIB 8307  | -                               | This study         |
| <i>D. desulfuricans subsp. desulfuricans</i> El Agheila Z | 1926       |       | NCIB 8380  | -                               | This study         |
| <i>D. desulfuricans subsp. desulfuricans</i> G20          |            |       |            | -                               | This study         |
| <i>D. desulfuricans</i> M8 and M9                         |            |       |            | +                               | (5)                |
| <i>D. gigas</i>                                           | 1382       | 19364 | NCIB 8332  | -                               | This study         |
| <i>D. salexigens</i>                                      | 2638       | 14822 |            | -                               | This study         |
| <i>D. vulgaris</i> Hildenborough                          | 644        | 29579 |            | -                               | (6), this study    |
| <i>D. vulgaris subsp. vulgaris</i> Marburg                | 2119       |       |            | -                               | (2)                |
| <i>D. strain BerOc1</i>                                   |            |       | BerOc 1    | +                               | (6)                |

<sup>a</sup>Methylation is listed as positive if MeHg production was reported at levels significantly above abiotic or negative controls. Because rates were measured under different culture conditions, and over different amounts of time, a quantitative comparison of rates is not possible.

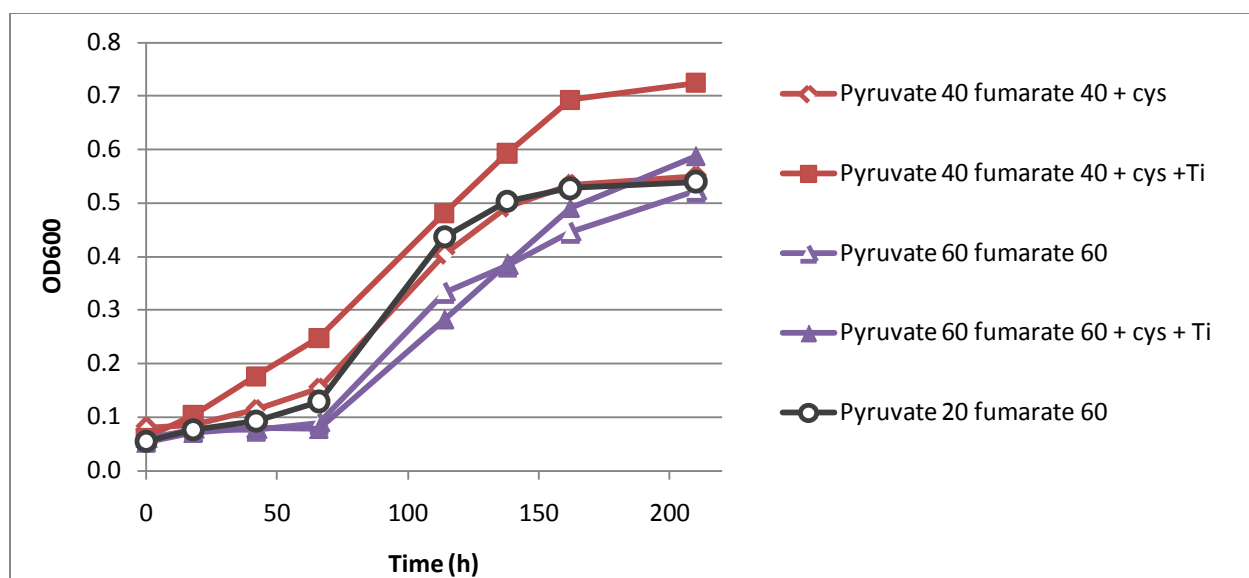

Figure S1. ND132 growth on pyruvate/fumarate medium (modified MOYPF) at 32° C. Cysteine was added to 1mM; Ti-citrate to 0.38 mM. Data points are averages for triplicate tubes.

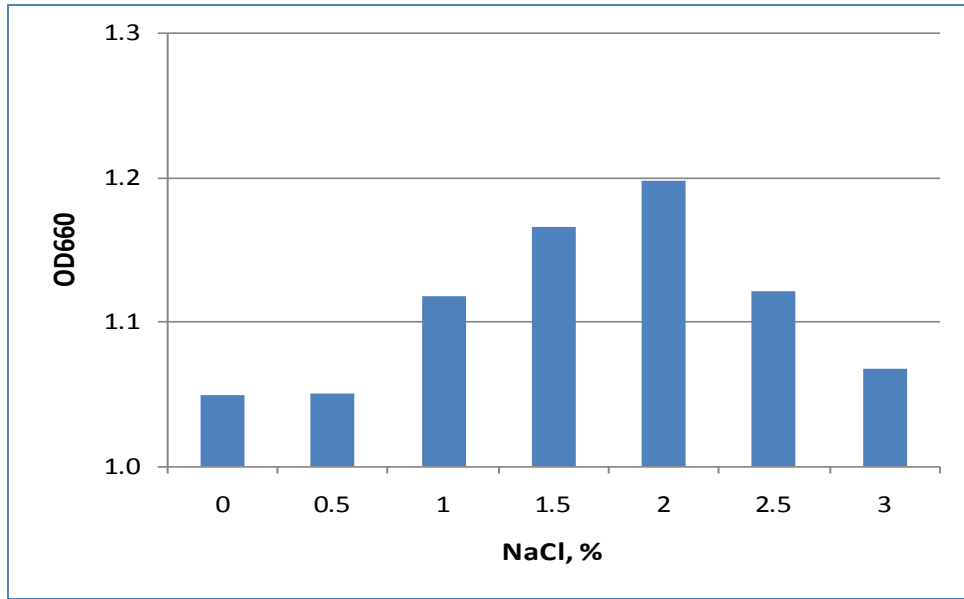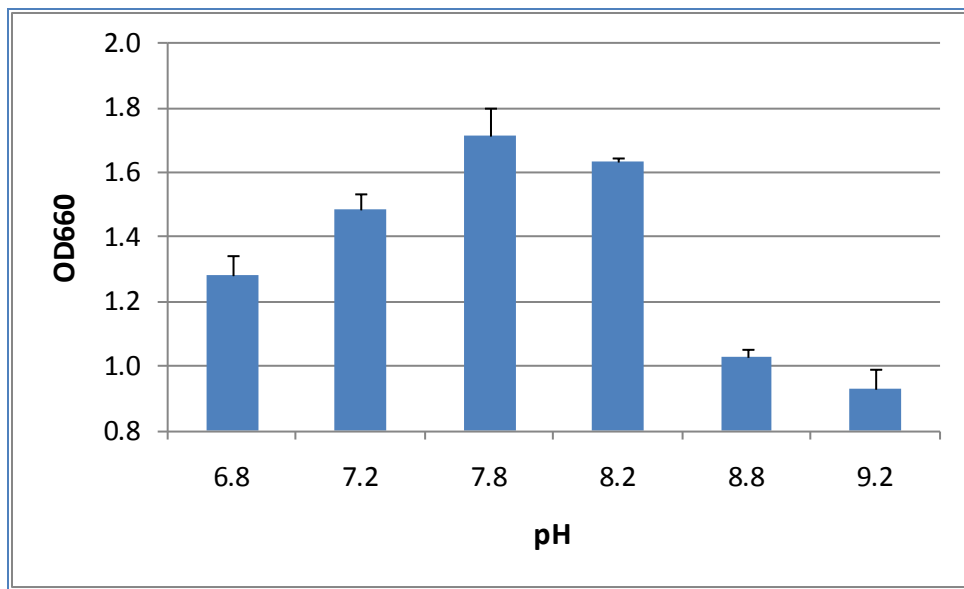

Figure S2. Optimal growth parameters for ND132 on lactate/sulfate medium (MOYLS4) at 32° C. Top, salt tolerance, bottom pH. Bars represent the average maximal optical density after growth to stationary phase (29 h) for duplicate cultures.

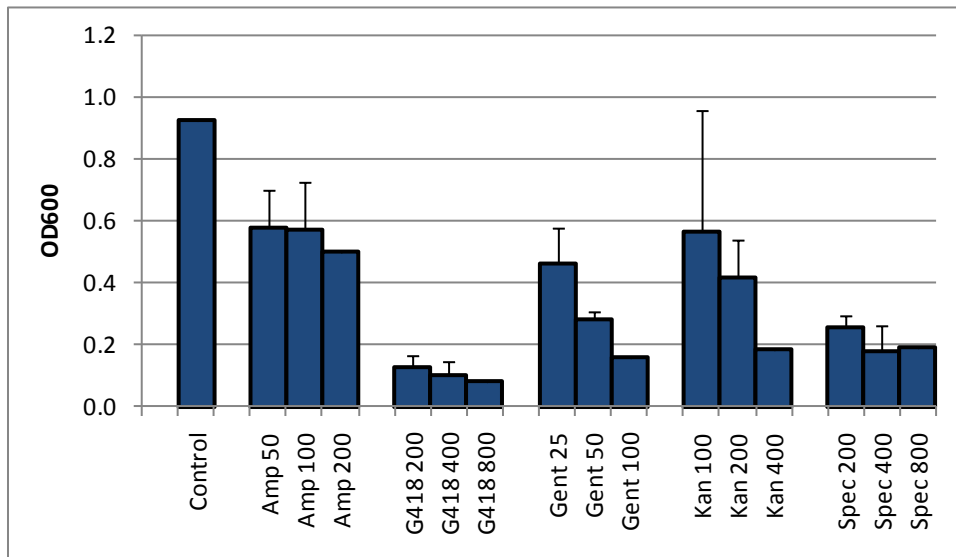

Figure S3: Antibiotic sensitivity of *D. desulfuricans* ND132, tested on lactate/sulfate (MOYLS4) medium. Growth is shown as optical density after 48 h growth at 32°C, minus the OD measured immediately after inoculation. Amp = ampicillin; Gen = gentamicin; Kan = kanamycin; Spec = spectinomycin. Antibiotic concentration values in µg/mL.

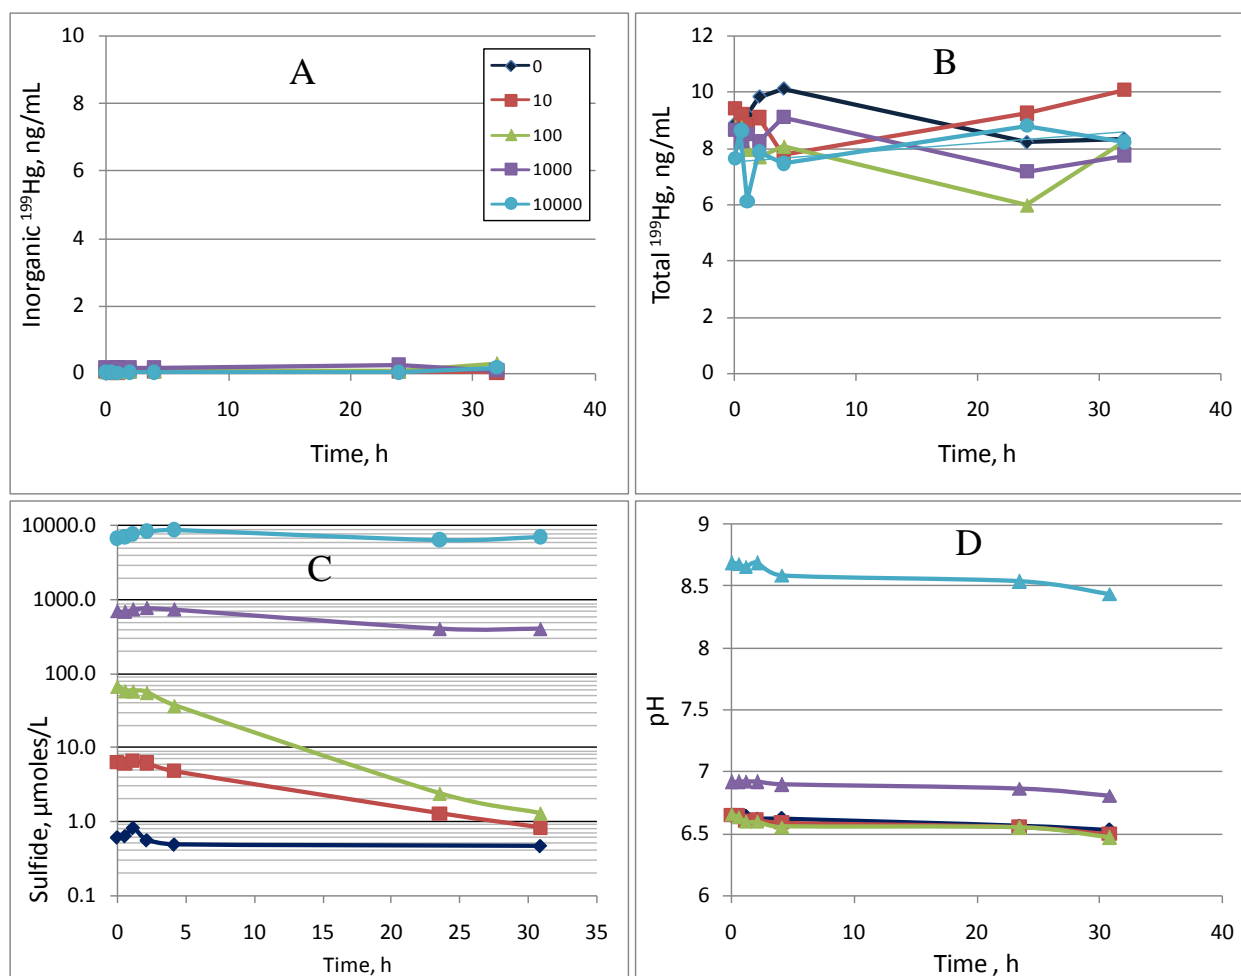

Figure S4. Lack of abiotic degradation of Me<sup>199</sup>Hg by sulfide over time in un-inoculated culture medium. Me<sup>199</sup>Hg was added at 10 ng/ml to un-inoculated SRM culture medium containing sulfide concentrations ranging from 10 to 1000 μM (plus a control without added sulfide), and the concentrations of inorganic <sup>199</sup>Hg (A), total <sup>199</sup>Hg (B), sulfide (C) and pH (D) were followed over 32 h. Media were reduced with 100 μM TiNTA.

Inorganic <sup>199</sup>Hg was measured directly by SnCl<sub>2</sub> reduction of samples; total <sup>199</sup>Hg was measured after the addition of BrCl. Bottom panels show sulfide and pH in the bottles over time. Additionally, on average, 98% of the total <sup>199</sup>Hg measured at the first time point was recovered from the bottles at the end of the experiment (after addition of BrCl to the bottles), demonstrating that MeHg was not degraded to elemental Hg.

## REFERENCES

1. **Compeau, G. C., and R. Bartha.** 1985. Sulfate-reducing bacteria - principal methylators of mercury in anoxic estuarine sediment. *Applied and Environmental Microbiology* **50**:498-502.
2. **Ekstrom, E. B., F. M. M. Morel, and J. M. Benoit.** 2003. Mercury methylation independent of the acetyl-coenzyme A pathway in sulfate-reducing bacteria. *Applied and Environmental Microbiology* **69**:5414-5422.
3. **King, J. K., J. E. Kostka, M. E. Frischer, and F. M. Saunders.** 2000. Sulfate-reducing bacteria methylate mercury at variable rates in pure culture and in marine sediments. *Applied and Environmental Microbiology* **66**:2430-2437.
4. **King, J. K., J. E. Kostka, M. E. Frischer, F. M. Saunders, and R. A. Jahnke.** 2001. A quantitative relationship that demonstrates mercury methylation rates in marine sediments are based on the community composition and activity of sulfate-reducing bacteria. *Environmental Science & Technology* **35**:2491-2496.
5. **Lin, C. C., and J. A. Jay.** 2007. Mercury methylation by planktonic and biofilm cultures of *Desulfovibrio desulfuricans*. *Environmental Science & Technology* **41**:6691-6697.
6. **Ranchou-Peyruse, M., M. Monperrus, R. Bridou, R. Duran, D. Amouroux, J. C. Salvado, and R. Guyoneaud.** 2009. Overview of mercury methylation capacities among anaerobic bacteria including representatives of the sulphate-reducers: Implications for environmental studies. *Geomicrobiology Journal* **26**:1-8.
